# Supplementary material for: Efficient dispersion of multi-walled carbon nanotubes in aqueous solution by non-covalent interaction with perylene bisimides
Source: Royal Society of Chemistry journal article supplement (doi:10.1039/c3ra42422g), 2013-01-01
Supplement: c3ra42422g.pdf [file c3ra42422g.pdf]

## Efficient Dispersion of Multi-walled Carbon Nanotubes in Aqueous Solution by Non-covalent Interaction with Perylene Bisimides

Rui Filipe Araújo,<sup>a</sup> Carlos Jorge R. Silva,<sup>a</sup> Maria Conceição Paiva,<sup>b</sup> Manuel Melle Franco,<sup>c</sup> and Maria Fernanda Proença<sup>\*a</sup>

<sup>a</sup> *Departamento de Química  
Universidade do Minho  
4710-057 Braga (Portugal)  
Fax: (+351) 253 604 379  
E-mail: fproenca@quimica.uminho*

<sup>b</sup> *Instituto de Polímeros e Compósitos/I3N  
Universidade do Minho  
4800-058 Guimarães (Portugal)*

<sup>c</sup> *Centro de Ciências e Tecnologias de Computação  
Universidade do Minho  
4710-057 Braga (Portugal)*

**Compound 3a**

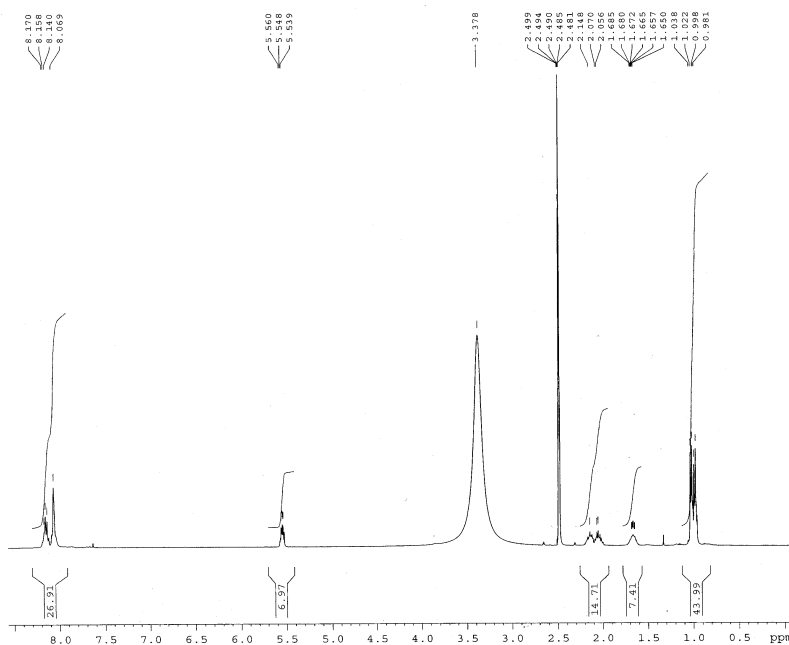

**<sup>1</sup>H NMR**

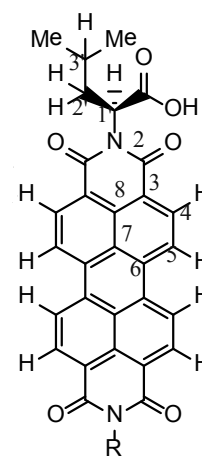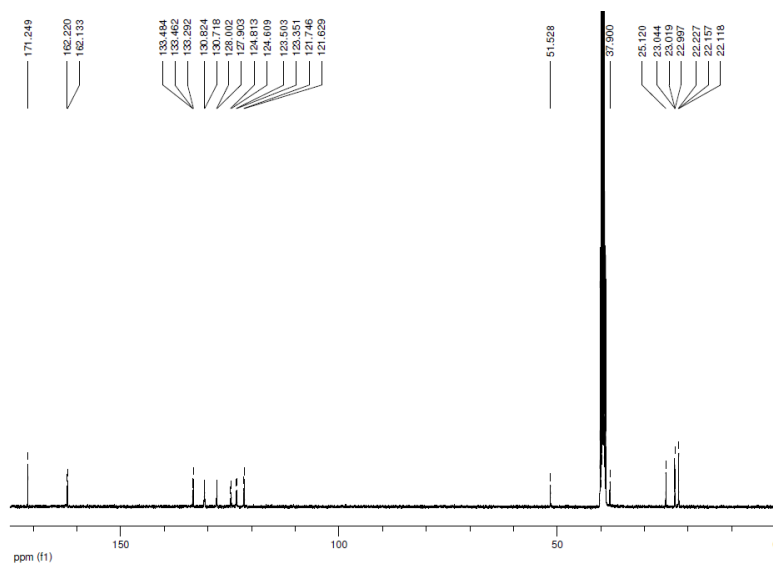

**<sup>13</sup>C NMR**

Compound **3a**, yield: 92 %, <sup>1</sup>HRMN (400 Mz, DMSO-d<sub>6</sub>, 20 °C): δ (ppm) 0.98 (d, 6H, J = 6.8 Hz, Me), 1.02 (d, 6H, J = 6.4 Hz, Me), 1.67 (m, 2H, J = 2.8 Hz, C<sub>3'</sub> - H), 2.06 (m, 2H, C<sub>2'</sub> - H), 2.15 (m, 2H, C<sub>2'</sub> - H), 5.55 (m, 2H, C<sub>1'</sub> - H), 8.06 (m, 4H, C - H perylene), 8.15 (m, 4H, C - H perylene). <sup>13</sup>CRMN (100 Mz, DMSO-d<sub>6</sub>, 20 °C): δ (ppm) 22.12 (Me), 22.16 (Me), 22.23 (Me), 23.00 (Me), 23.02 (Me), 23.04 (Me), 25.12 (C<sub>3'</sub>), 37.90 (C<sub>2'</sub>), 51.53 (C<sub>1'</sub>), 121.63, 121.75, 123.35 e 123.50 (C from C - H of perylene), 124.61, 124.81, 127.90, 128.00, 130.80 e 130.82 (C from C - H of perylene), 133.29, 133.46, 133.48, 162.12 (C=O, perylene), 162.22 (C=O, perylene), 171.25 (COOH). FT - IR (KBr, cm<sup>-1</sup>): 3467, 2958, 2935, 2869, 1731, 1697, 1658, 1593, 1434, 1404, 1361, 1346, 1253, 1176, 1130, 1022, 975, 810, 748, 713. Elemental analysis calcd (%) for C<sub>36</sub>H<sub>30</sub>N<sub>2</sub>O<sub>8</sub>: C 69.89, H 4.89, N 4.53; found: C 69.65, H 4.80, N 4.67.

**Compound 3b**

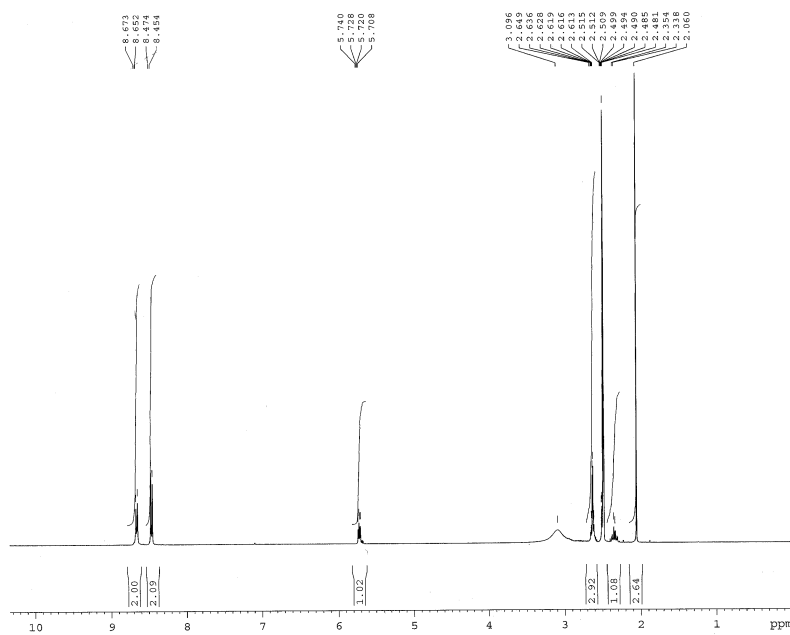

**<sup>1</sup>H NMR**

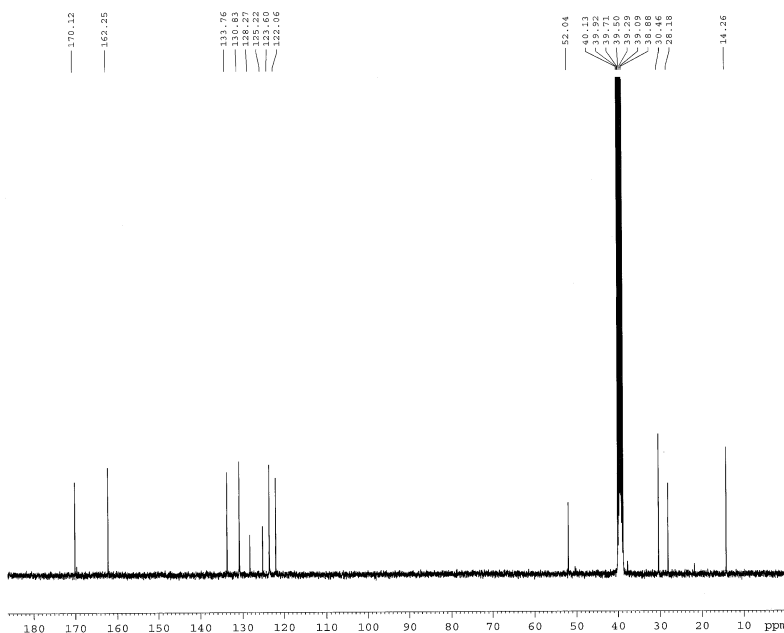

**<sup>13</sup>C NMR**

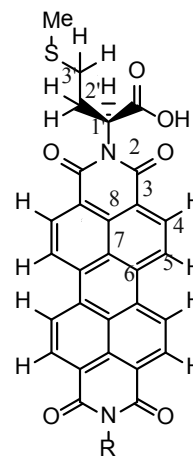

Compound **3b**, yield: 96 %, <sup>1</sup>HRMN (400 Mz, DMSO-d<sub>6</sub>, 70 °C): δ (ppm) 2.06 (s, 6 H, Me), 2.35 (m, 2 H, C<sub>2</sub>' - H), 2.62 (m, 2 H, C<sub>2</sub>' - H), 2.62 (m, 4 H, C<sub>3</sub>' - H), 5.72 (dd, 2 H, J = 8 Hz, J = 4.8 Hz, C<sub>1</sub>' - H), 8.46 (d, 4 H, J = 8 Hz, C<sub>4</sub> - H), 8.66 (d, 4 H, J = 8.4 Hz, C<sub>5</sub> - H). <sup>13</sup>CRMN (100 Mz, DMSO-d<sub>6</sub>, 70 °C): δ (ppm) 14.26 (Me), 28.18 (C<sub>2</sub>'), 30.46 (C<sub>3</sub>'), 52.04 (C<sub>1</sub>'), 122.06, 123.60 (C<sub>5</sub>), 125.22, 128.27 (C<sub>8</sub>), 130.83 (C<sub>4</sub>), 133.76 (C<sub>6</sub>), 162.25 (C<sub>2</sub>), 170.12 (COOH). FT - IR (KBr, cm<sup>-1</sup>): 3487, 2916, 1735, 1697, 1658, 1593, 1573, 1434, 1400, 1361, 1346, 1253, 1176, 1126, 860, 810, 748, 640. Elemental analysis calcd (%) for C<sub>34</sub>H<sub>26</sub>N<sub>2</sub>O<sub>8</sub>S<sub>2</sub>: C 62.37, H 4.00, N 4.28, S 9.80; found: C 61.25, H 3.98, N 4.39, S 9.72.

**Compound 3c**

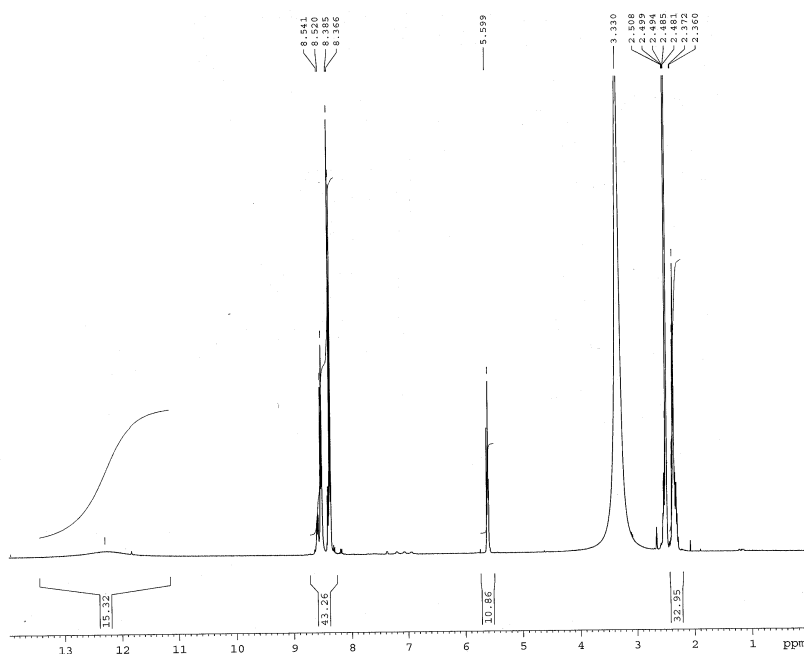

**<sup>1</sup>H NMR**

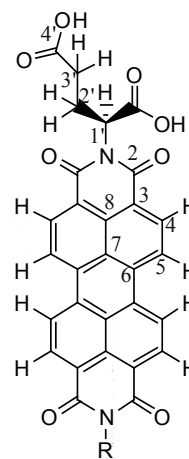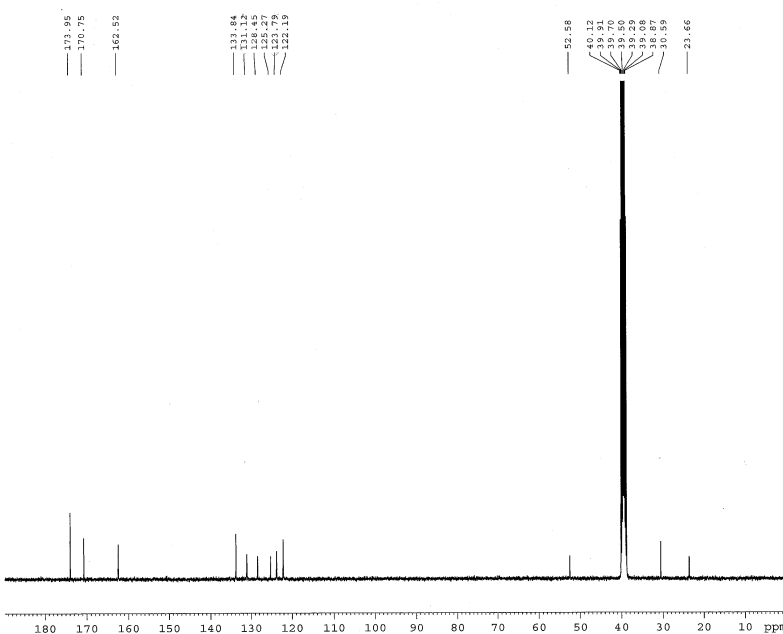

**<sup>13</sup>C NMR**

Compound **3c**, yield: 71 %, <sup>1</sup>HRMN (400 Mz, DMSO-d<sub>6</sub>, 20 °C): δ (ppm) 2.37 (m, 4 H, C<sub>3'</sub> - H), 2.37 (m, 2 H, C<sub>2'</sub> - H), 2.51 (m, 2 H, C<sub>2'</sub> - H), 5.61 (dd, 2 H, J = 9.2 Hz, J = 4.4 Hz, C<sub>1'</sub> - H), 8.38 (d, 4 H, J = 8.4 Hz, C<sub>4</sub> - H), 8.53 (d, 4 H, J = 8.4 Hz, C<sub>5</sub> - H), 12.30 (s broad, COOH). <sup>13</sup>CRMN (100 Mz, DMSO-d<sub>6</sub>, 20 °C): δ (ppm) 23.66 (C<sub>2'</sub>), 30.59 (C<sub>3'</sub>), 52.58 (C<sub>1'</sub>), 122.19, 123.79 (C<sub>5</sub>), 125.27, 128.45, 131.12 (C<sub>4</sub>), 133.84, 162.52 (C<sub>2</sub>), 170.75 (COOH), 173.95 (C<sub>4'</sub>). FT - IR (KBr, cm<sup>-1</sup>): 3440, 3163, 3116, 2927, 1747, 1697, 1647, 1593, 1573, 1438, 1384, 1365, 1342, 1257, 1180, 1134, 975, 864, 810, 748, 644. Elemental analysis calcd (%) for C<sub>34</sub>H<sub>22</sub>N<sub>2</sub>O<sub>12</sub>: C 62.77, H 3.41, N 4.31; found: C 63.34, H 3.35, N 4.29.

**Compound 3d**

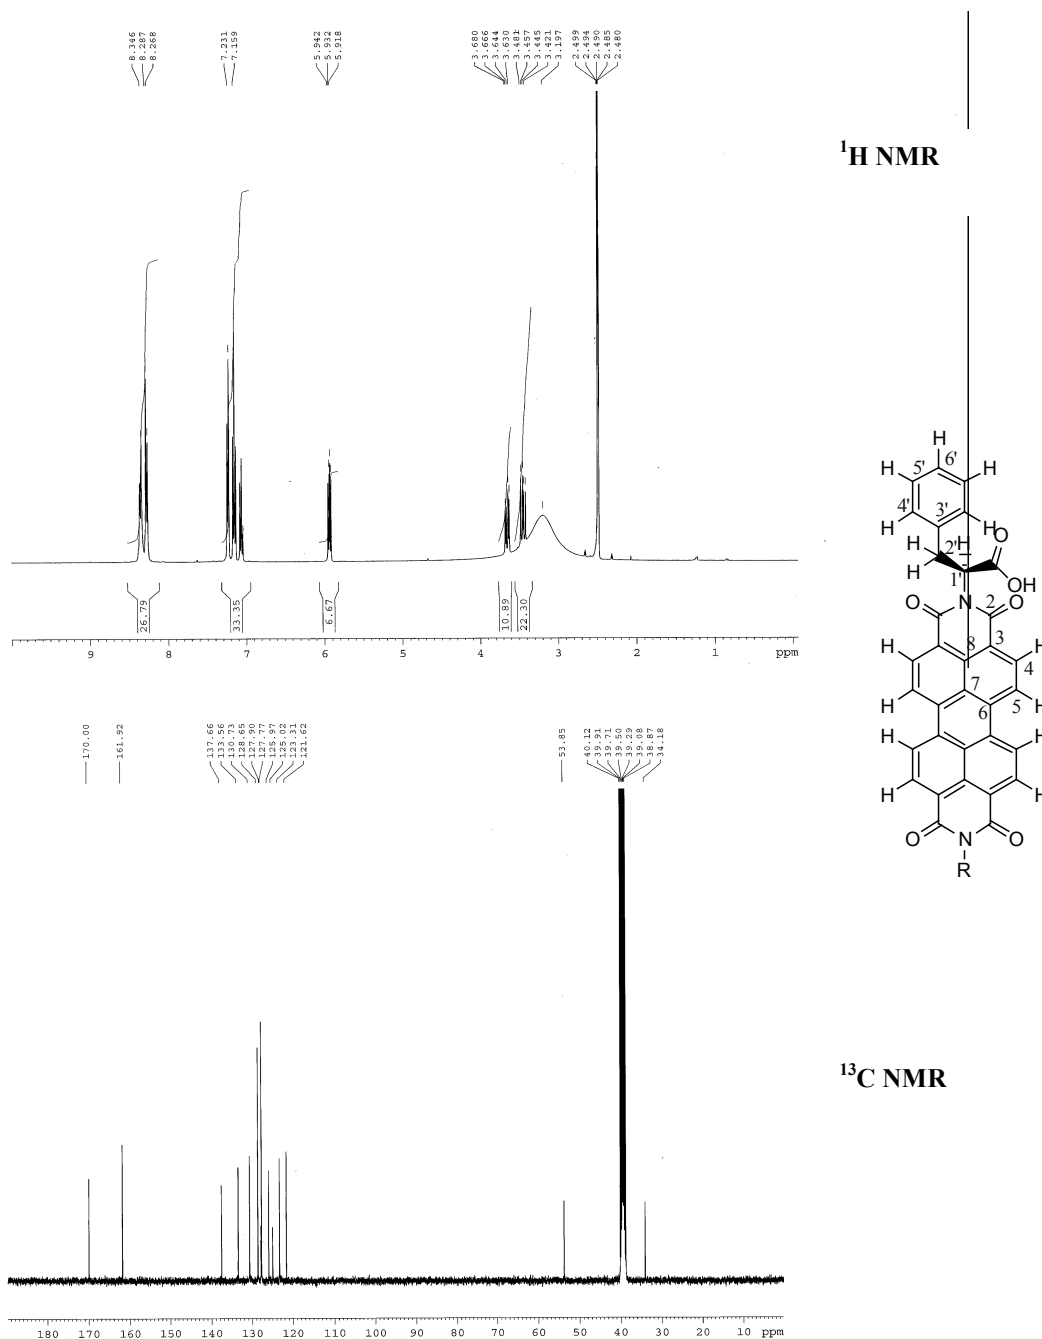

Compound **3d**, yield: 97 %. <sup>1</sup>HRMN (400 Mz, DMSO-d<sub>6</sub>, 70 °C): δ (ppm) 3.45 (dd, 2 H, J = 14.4 Hz, J = 9.6 Hz, C<sub>2'</sub> – H), 3.66 (dd, 2 H, J = 14.4 Hz, J = 5.6 Hz, C<sub>2'</sub> – H), 5.94 (dd, 2 H, J = 9.6 Hz, J = 5.6 Hz, C<sub>1'</sub> – H), 7.07 (t, 2 H, J = 7.2 Hz, C<sub>6'</sub> – H), 7.16 (t, 4 H, J = 6.6 Hz, C<sub>5'</sub> – H), 7.24 (d, 4H, J = 7.6 Hz, C<sub>4'</sub> – H) 8.28 (d, 4H, J = 8.28, C<sub>4</sub> – H), 8.36 (d, 4H, J = 8.36, C<sub>5</sub> – H). <sup>13</sup>CRMN (100 Mz, DMSO-d<sub>6</sub>, 70 °C): 34.18 (C<sub>2'</sub>), 53.85 (C<sub>1'</sub>), 121.62, 123.31 (C<sub>5</sub>), 125.02, 125.97 (C<sub>6'</sub>), 127.77 (C<sub>5'</sub>), 127.90 (C<sub>8</sub>), 128.65 (C<sub>4'</sub>), 130.73 (C<sub>4</sub>), 133.56 (C<sub>6</sub>), 137.66 (C<sub>3'</sub>), 161.92 (C<sub>2</sub>), 170.00 (COOH). FT – IR (KBr, cm<sup>-1</sup>): 3502, 3028, 2935, 1735, 1697, 1658, 1593, 1573, 1496, 1434, 1400, 1365, 1342, 1253, 1168, 1126, 979, 952, 856, 810, 748,

698, 648, 601. Elemental analysis calcd (%) for  $C_{42}H_{26}N_2O_8$ : C 73.46, H 3.82, N 4.08; found: C 72.34, H 3.75, N 4.15.

**Compound 3e**

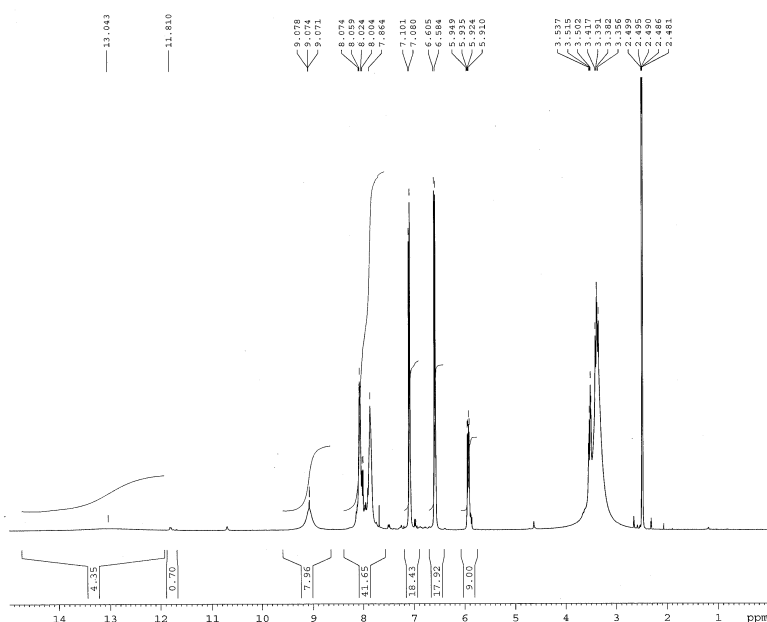

**<sup>1</sup>H NMR**

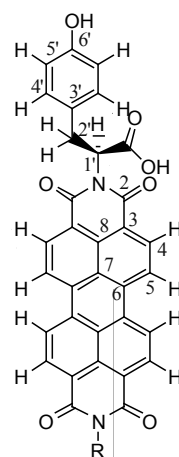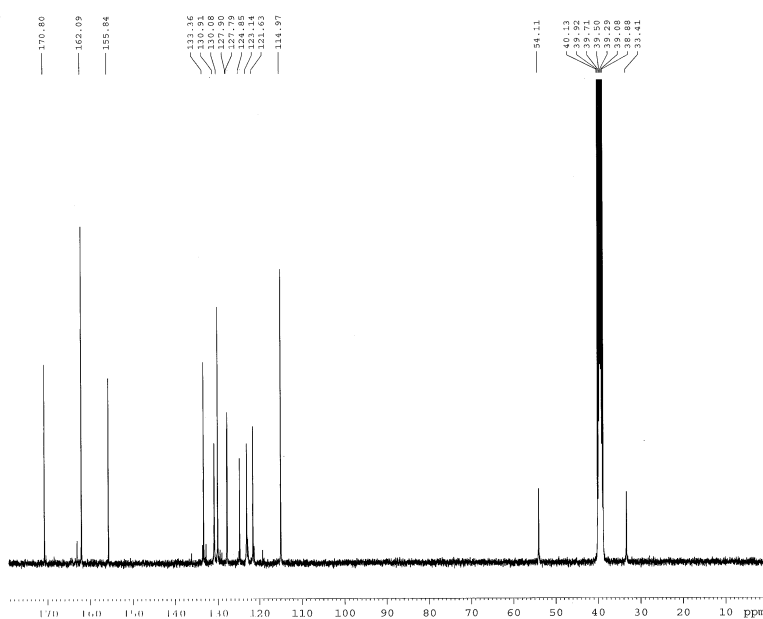

**<sup>13</sup>C NMR**

**Compound 3e**, yiled: 85 %, <sup>1</sup>HRMN (400 Mz, DMSO-d<sub>6</sub>, 20 °C): δ (ppm) 3.39 (dd, 2 H, J = 14 Hz, J = 10.4 Hz, C<sub>2</sub> - H), 3.53 (dd, 2 H, J = 14 Hz, J = 5.2 Hz, C<sub>2</sub>' - H), 5.93 (dd, 2 H, J = 10Hz, J = 5.6 Hz, C<sub>1</sub>'), 6.59 (d, 4 H, J = 8.4 Hz, C<sub>5</sub>' - H), 7.09 (d, 4 H, J = 8.4 Hz, C<sub>4</sub>' - H), 7.86 (s broad, 4 H, C<sub>5</sub> - H), 8.07 (s broad, 4 H, C<sub>4</sub> - H). <sup>13</sup>CRMN (100 Mz, DMSO-d<sub>6</sub>, 20 °C): δ (ppm) 33.41 (C<sub>2</sub>'), 54.11 (C<sub>1</sub>'), 114.97 (C<sub>5</sub>'), 121.63, 123.14 (C<sub>5</sub>), 124.85, 127.79 (C<sub>3</sub>'), 127.90, 130.08 (C<sub>4</sub>'), 130.91 (C<sub>4</sub>), 133.36 (C<sub>6</sub>), 155.84 (C<sub>6</sub>'), 162.09 (C<sub>2</sub>), 170.80 (COOH). FT - IR (KBr, cm<sup>-1</sup>): 3379, 2935, 1731, 1697, 1650, 1593, 1573, 1512, 1434,

1400, 1365, 1342, 1253, 1222, 1168, 1130, 952, 860, 810, 748, 644, 597. Elemental analysis calcd (%) for  $C_{42}H_{26}N_2O_{10}$ : C 70.19, H 3.65, N 3.90; found: C 69.85, H 3.81, N 4.20.

**Compound 3f**

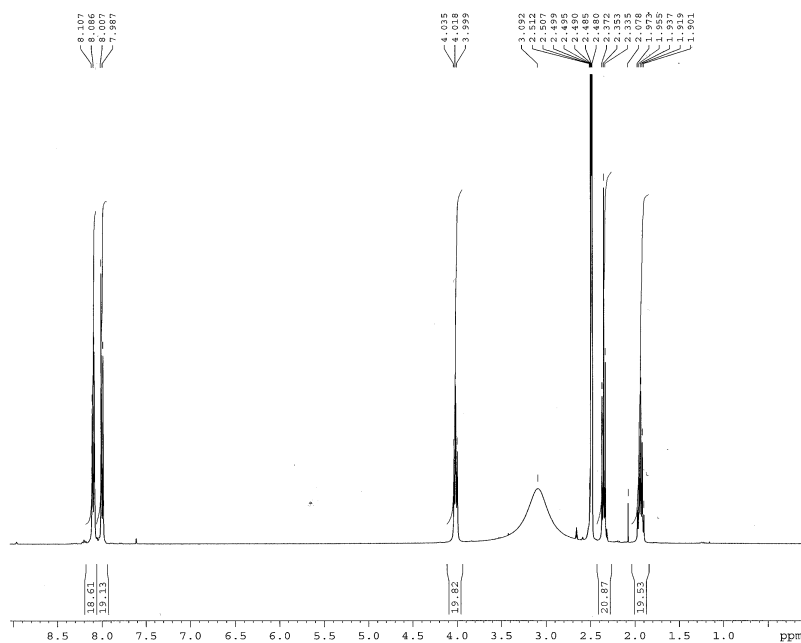

**$^1H$  NMR**

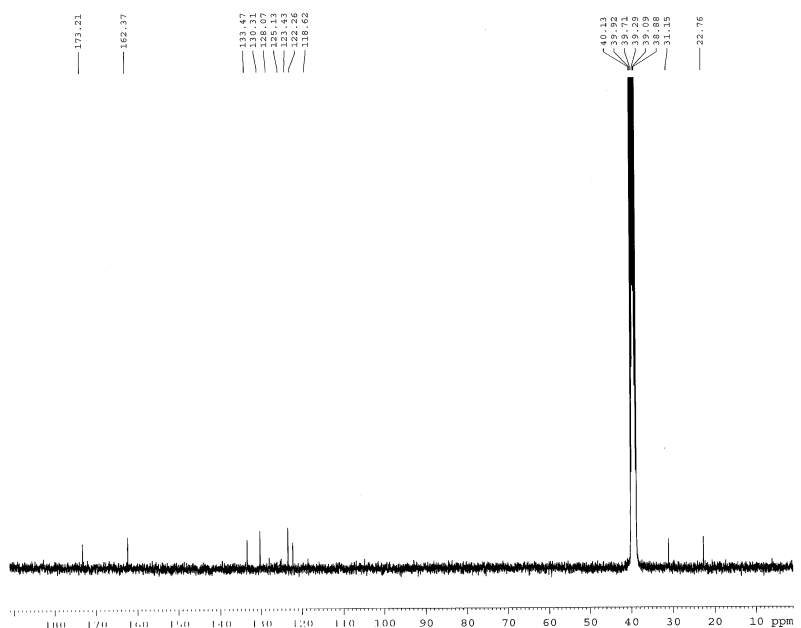

**$^{13}C$  NMR**

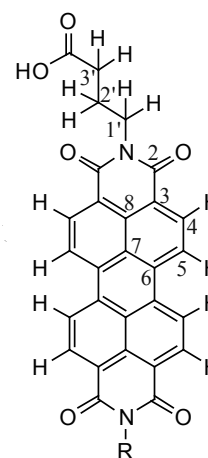

Compound **3f**, yield: 81 %,  $^1H$  RMN (400 Mz, DMSO- $d_6$ , 80 °C):  $\delta$  (ppm) 1.94 (m, 4 H,  $C_{2'}$  - H), 2.35 (t, 4 H,  $J = 7.4$  Hz,  $C_{3'}$  - H), 4.02 (t, 4 H,  $J = 7.2$  Hz,  $C_{1'}$  - H), 8.00 (d, 4 H,  $J = 8$  Hz,  $C_4$  - H), 8.10 (d, 4 H,  $J = 8.4$  Hz,  $C_5$  - H).  $^{13}C$ RMN (100 Mz, DMSO- $d_6$ , 80 °C):  $\delta$  (ppm) 22.76 ( $C_{3'}$ ), 31.15 ( $C_{2'}$ ), 39.29 ( $C_{1'}$ ), 122.26, 123.43 ( $C_5$ ), 125.13, 128.07 ( $C_8$ ), 130.31 ( $C_4$ ), 133.47 ( $C_6$ ), 162.37 ( $C_2$ ), 173.21 (COOH). FT - IR (KBr,  $cm^{-1}$ ): 3552, 2927, 2869, 1731, 1693, 1650, 1593, 1577, 1442, 1400, 1384, 1342, 1249, 1164, 1126,

1056, 856, 810, 744. Elemental analysis calcd (%) for  $C_{32}H_{22}N_2O_8$ : C 68.32, H 3.94, N 4.98; found: C 69.95, H 3.37, N 4.66.

### Compound **3g**

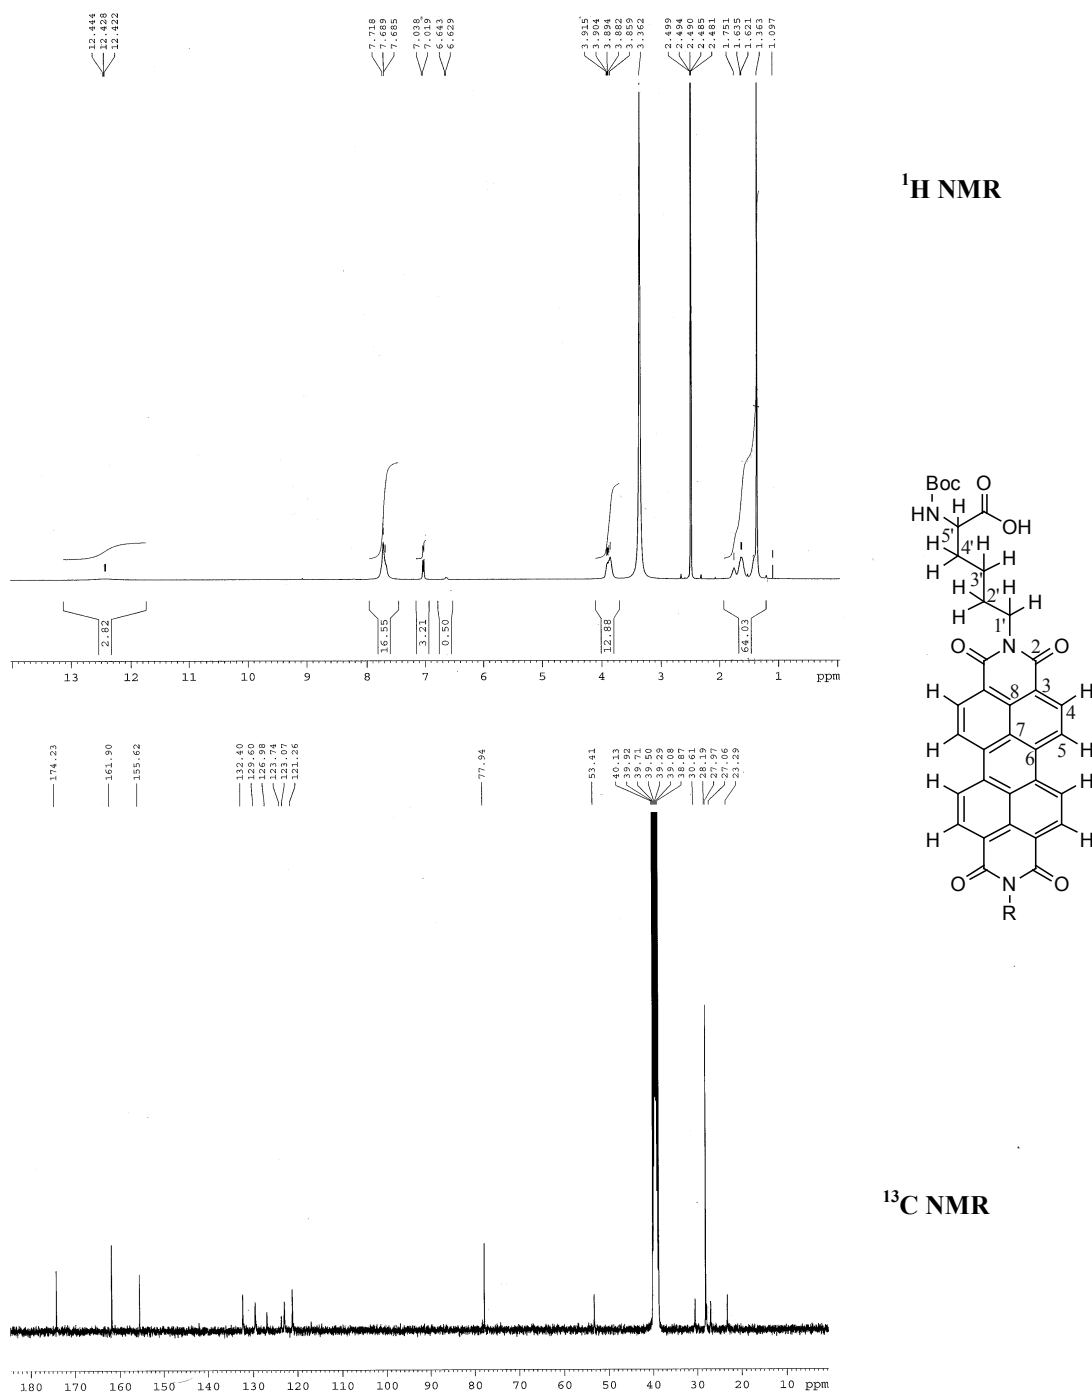

Compound **3g**, yield: 90 %,  $^1H$ RMN (400 Mz, DMSO- $d_6$ , 20 °C):  $\delta$  (ppm) 1.36 (s, 18 H, Me from Boc), 1.40 (m, 4 H), 1.63 (m, 4 H), 1.63 (m, 2 H,  $C_{4'}$  - H), 1.75 (m, 2H,  $C_{4'}$  - H), 3.89 (m, 6 H,  $C_{1'}$  - H e  $C_{5'}$  - H), 7.03 (d, 2 H,  $J = 7.6$  Hz, N - H), 7.69 (s broad, 8 H,  $C_4$  - H e  $C_5$  - H).  $^{13}C$  RMN (100 Mz, DMSO- $d_6$ , 20 °C):  $\delta$  (ppm) 23.29 ( $C_{3'}$ ), 27.06, 28.19 (Me from Boc), 30.61 ( $C_{4'}$ ), 39.71 ( $C_{1'}$  ou  $C_{5'}$ ), 53.41 ( $C_{1'}$  ou  $C_{5'}$ ), 77.94 ( $C(Me)_3$  from Boc), 121.26, 123.07 ( $C_4$  ou  $C_5$ ), 123.74, 126.98, 129.60 ( $C_4$  ou  $C_5$ ), 132.40, 155.62



(2C, C=O from Boc), 161.90 (C<sub>2</sub>), 174.23 (COOH). FT – IR (KBr, cm<sup>-1</sup>): 3506, 3355, 2970, 2931, 2866, 1697, 1650, 1593, 1577, 1508, 1442, 1400, 1342, 1249, 1164, 1126, 1087, 1068, 1049, 1018, 856, 810, 744, 628. Elemental analysis calcd (%) for C<sub>46</sub>H<sub>50</sub>N<sub>4</sub>O<sub>12</sub>: C 64.93, H 5.92, N 6.58; found: C 63.76, H 5.50, N 6.71.
